# Supplementary material
Source: PubMed Central journal article supplement (PMC4966334)
Supplement: kmab-07-06-1081323-s001.pdf [file kmab-07-06-1081323-s001.pdf]

# 1 Supplementary Tables

## 2 Suppl. Table 1: Data collection and refinement statistics

3

|                                                      | Free canakinumab Fab     | Canakinumab complex with IL-1 $\beta$         |
|------------------------------------------------------|--------------------------|-----------------------------------------------|
| <b>Data collection</b>                               |                          |                                               |
| X-ray source                                         | SLS beamline XS06A       | FR-E rotating anode                           |
| Wavelength                                           | 0.97950Å                 | 1.54178Å                                      |
| Detector type                                        | MAR165 CCD               | MAR345 DTB Imaging plate                      |
| Number of crystals                                   | 1                        | 1                                             |
| Space group                                          | P2 <sub>1</sub>          | P2 <sub>1</sub> 2 <sub>1</sub> 2 <sub>1</sub> |
| Cell dimensions                                      |                          |                                               |
| <i>a</i> , <i>b</i> , <i>c</i> (Å)                   | 80.62, 142.26, 83.80     | 50.93, 56.28, 191.70                          |
| $\alpha$ , $\beta$ , $\gamma$ (°)                    | 90.00, 115.76, 90.00     | 90.00, 90.00, 90.00                           |
| Resolution (Å)                                       | 2.00 (2.07-2.00)         | 2.20 (2.28-2.20)                              |
| Number of molecules in asymmetric unit               | 4 Fabs                   | 1 Fab complex                                 |
| <i>R</i> <sub>sym</sub> or <i>R</i> <sub>merge</sub> | 0.057 (0.148)            | 0.038 (0.179)                                 |
| <i>I</i> / $\sigma(I)$                               | 11.7 (4.4)               | 24.7 (7.3)                                    |
| Completeness (%)                                     | 100.0 (99.9)             | 99.0 (99.8)                                   |
| Redundancy                                           | 4.8 (4.5)                | 7.0 (6.7)                                     |
| <b>Refinement</b>                                    |                          |                                               |
| Resolution (Å)                                       | 50.81-2.00               | 49.22-2.20                                    |
| No. reflections/test reflections                     | 114,268                  | 28,599/1,459                                  |
| <i>R</i> <sub>work</sub> / <i>R</i> <sub>free</sub>  | 0.186/0.228              | 0.188/0.231                                   |
| <i>No. atoms</i>                                     |                          |                                               |
| Protein                                              | 13,207                   | 4,489                                         |
| Buffer ions                                          | -                        | 2 x Cl <sup>-</sup>                           |
| Water                                                | 1,234                    | 254                                           |
| <i>B-factors</i> (Å <sup>2</sup> )                   |                          |                                               |
| Protein                                              | 24.3                     | 55.0                                          |
| Buffer ions                                          | -                        | 59.2                                          |
| Water                                                | 32.2                     | 45.8                                          |
| <i>R.m.s. deviations</i>                             |                          |                                               |
| Bond lengths (Å)                                     | 0.006                    | 0.010                                         |
| Bond angles (°)                                      | 1.4                      | 1.18                                          |
| Ramachandran outliers                                | Ala51 (chain A, C, E, G) | Ala51 (chain L)                               |

4  
5 (Values in parentheses are for the highest resolution shell)

## Supplementary Figures

### Suppl. Figure 1: Final (2Fo-Fc) electron-density maps

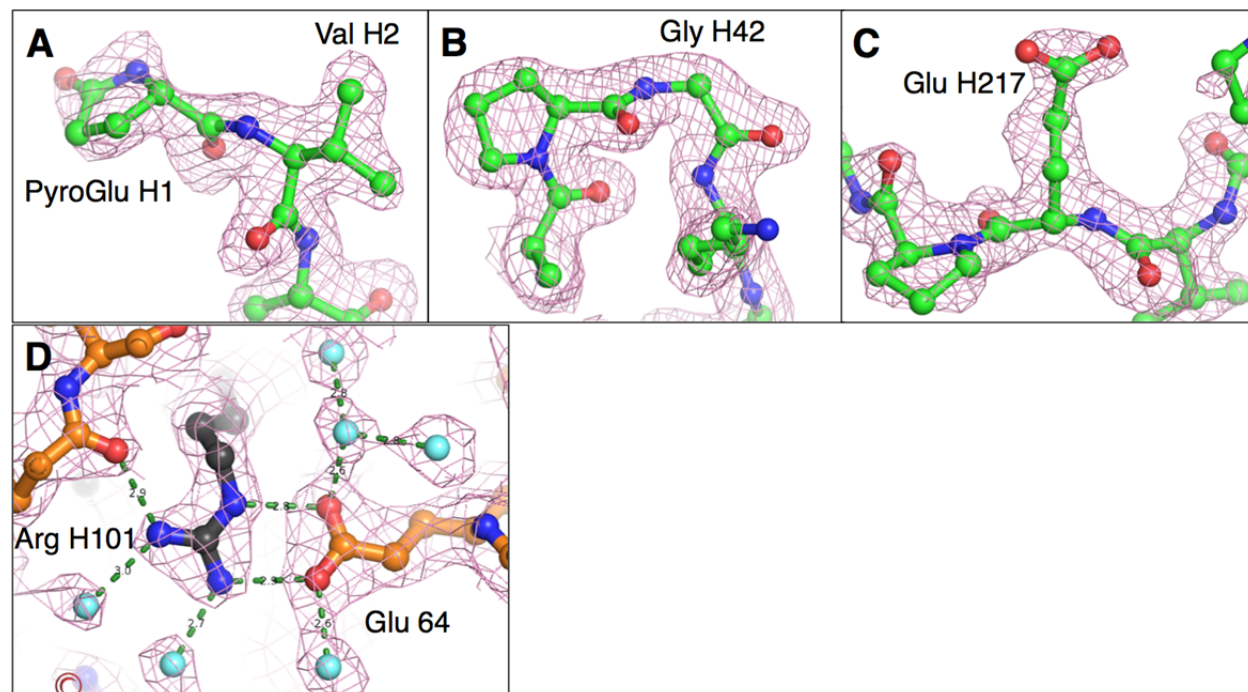

**Suppl. Figure 1:** The final (2Fo-Fc) electron-density is shown (1.0σ contour) for selected regions, differing from the previously reported structures.<sup>14</sup> **A, B** and **C**: free canakinumab Fab. **A**. N-terminus of the heavy-chain: the electron-density is consistent with the presence of a pyroglutamic acid residue. **B**. Residues 41-43 of the heavy-chain: the electron-density is consistent with the presence of a glycine at position 42. **C**. Residues 216-218 of the heavy-chain: the electron-density is consistent with the presence of a glutamate at position 217. **D**: IL-1β complex. Interaction between Glu 64 of IL-1β and Arg H101 of canakinumab. Note the short contact between Glu 64 Oε2 and Arg H101 Nε.

Suppl. Figure 2: Crystal structure of the free canakinumab Fab. Conformation of H-CDR3

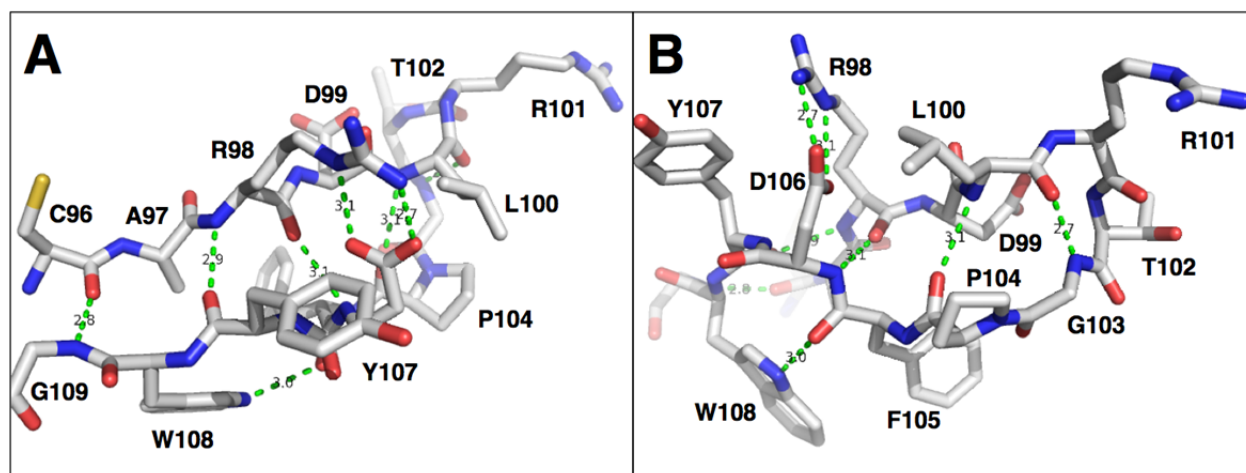

**Suppl. Figure 2:** The conformation of H-CDR3 of canakinumab in the free state. **A.** Bulged *torso* region of H-CDR3, exhibiting the typical salt-bridge interaction between Asp H106 and Arg H98, and the H-bonded contact between the main-chain carbonyl oxygen of Asp H106 and the side-chain of Trp H108. **B.** Head region of H-CDR3 with a *trans*-proline at position H104.

1 **Suppl. Figure 3 : Topology of the canakinumab epitope on human IL-1 $\beta$**

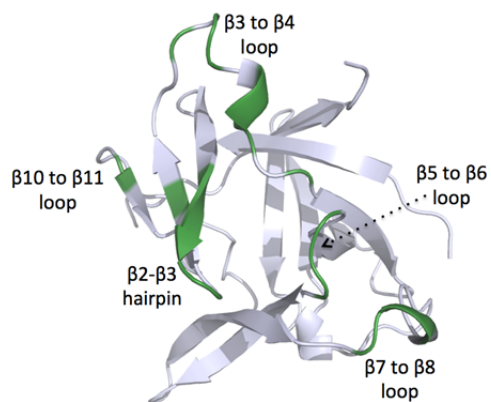

2

3 **Suppl. Figure 3:** Human IL-1 $\beta$  is shown in cartoon representation with the structural elements

4 constituting the canakinumab epitope highlighted in deep green.

5

6

**Suppl. Figure 4: The canakinumab paratope**

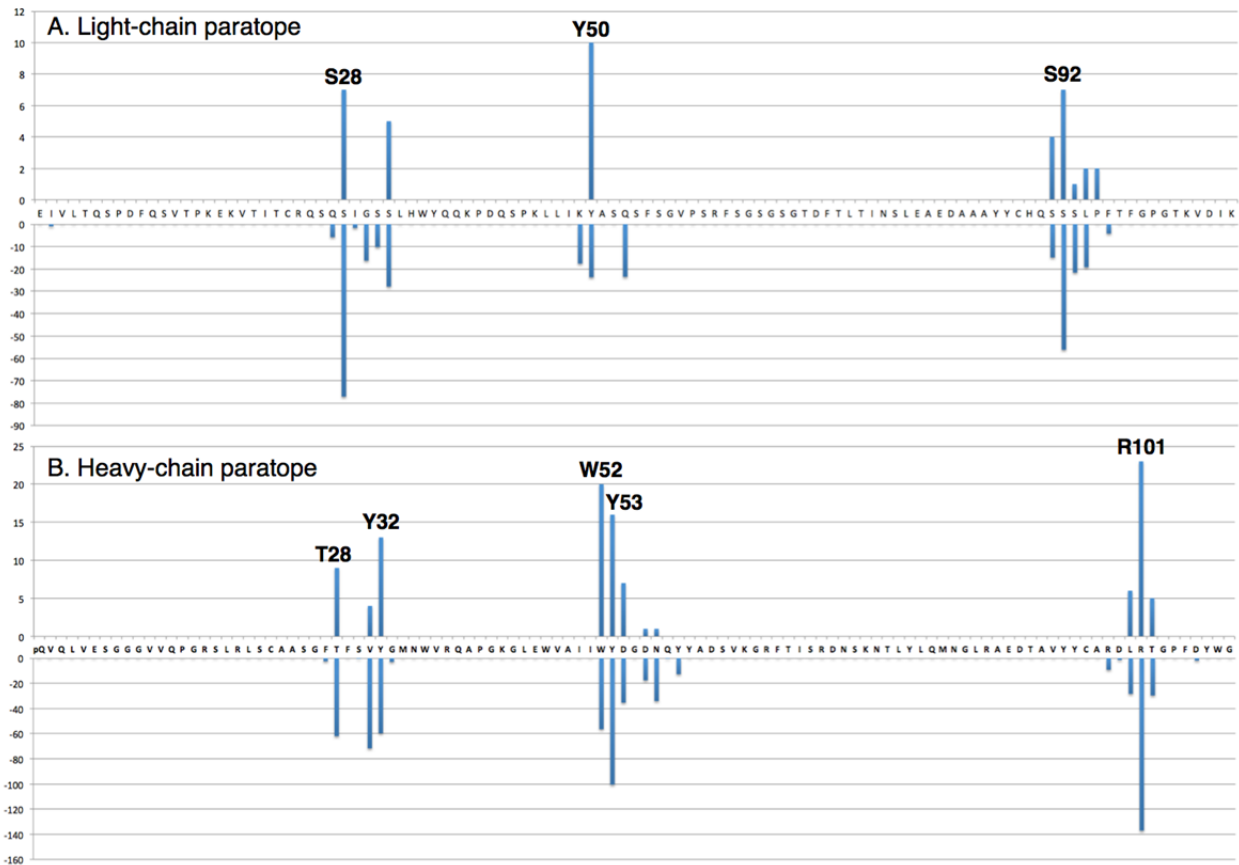

**Suppl. Figure 4: The canakinumab paratope. A.** The amino-acid sequence of the variable domain of the canakinumab light-chain is shown on the horizontal axis together with the number of direct intermolecular contacts to IL-1 $\beta$  (3.9Å distance cut-off; Y-axis, upper half) and the reduction in solvent-accessible surface upon antigen binding (in Å<sup>2</sup>; Y-axis, lower half). **B.** Same as above for the heavy-chain of canakinumab. Note the involvement of all six CDRs in antigen binding, including in particular L-CDR2.

1 **Suppl. Figure 5: The canakinumab epitope on human IL-1 $\beta$**

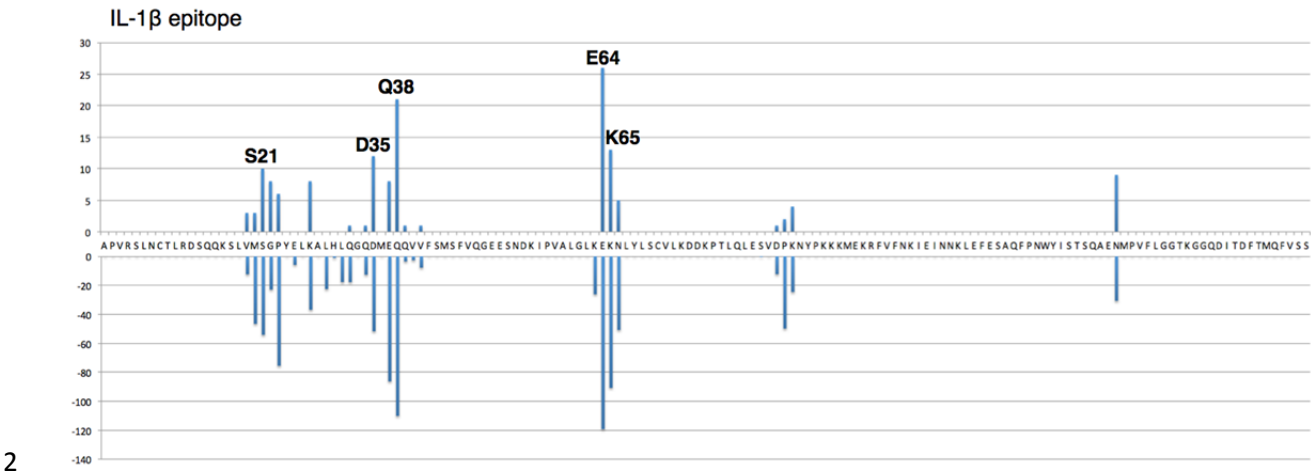

3 **Suppl. Figure 5:** The canakinumab epitope on human IL-1 $\beta$ . **A.** The amino-acid sequence of human IL-  
4 1 $\beta$  is shown on the horizontal axis together with the number of direct intermolecular contacts to IL-1 $\beta$   
5 (3.9Å distance cut-off; Y-axis, upper half) and the reduction in solvent-accessible surface upon antibody  
6 binding (in Å<sup>2</sup>; Y-axis, lower half).

7

8

9

10

**Suppl. Figure 6: Close-up views of binding interactions between canakinumab and IL-1 $\beta$**

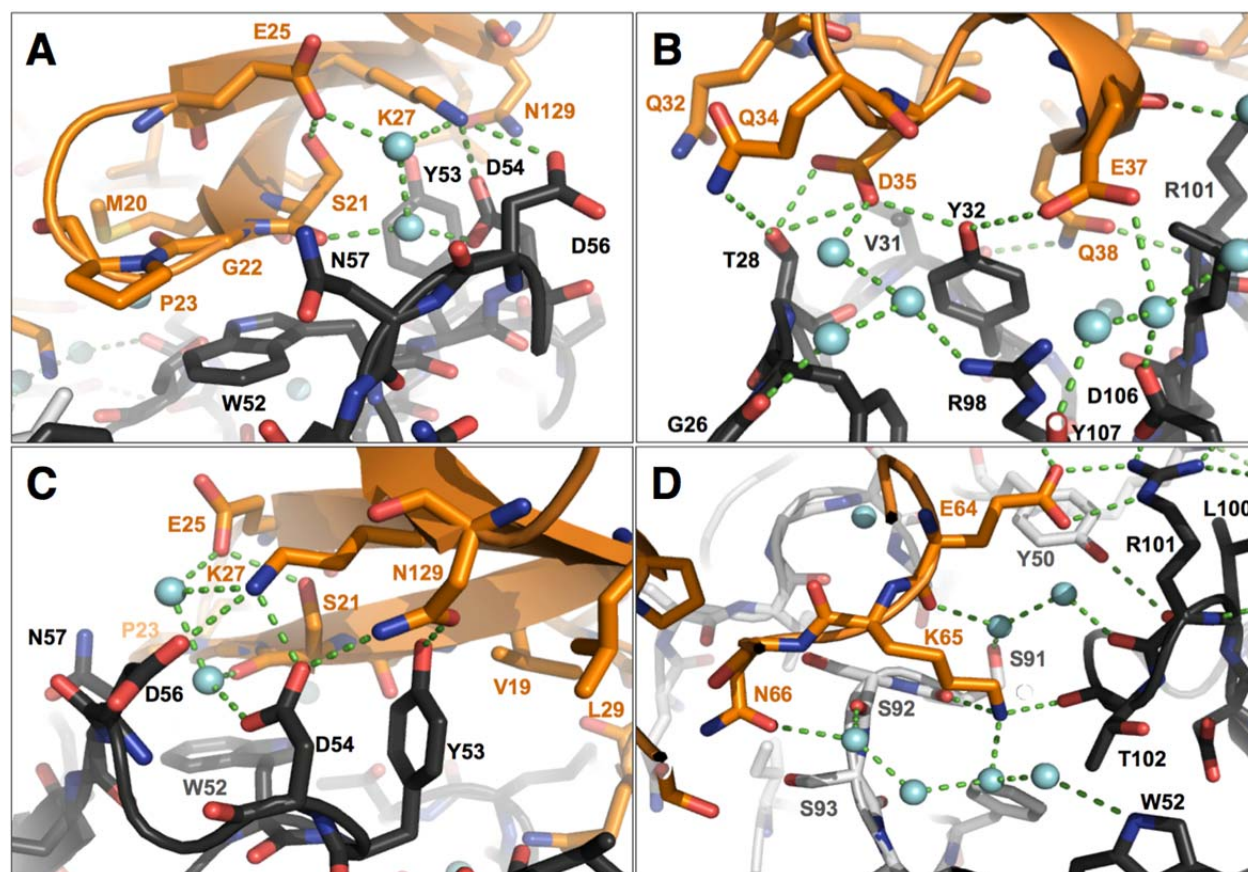

**Suppl. Figure 6:** Close-up view of binding interactions between canakinumab and human IL-1 $\beta$ . Heavy- and light-chain paratope residues are in black and light-grey sticks, respectively, while epitope residues are in orange. Light-blue spheres denote water molecules, dashed lines close contacts (< 3.5Å). **A.** Binding interactions involving the  $\beta$ 2- $\beta$ 3  $\beta$ -hairpin of IL-1 $\beta$ . Note the hydrophobic contacts of Gly 22 and Pro 23 with the Trp H52 side-chain and the electrostatic interactions of Lys 27 with Asp H54 and Asp H56. **B.** Binding interactions involving the  $\beta$ 3 to  $\beta$ 4 loop of IL-1 $\beta$ . Note the H-bonded contacts made by Gln 34, Asp 35, Glu 37 and Gln 38. **C.** Binding interactions involving the  $\beta$ 10 to  $\beta$ 11 loop of IL-1 $\beta$ . Note the H-bonded contacts made by Asn 129. **D.** Binding interactions involving the  $\beta$ 5 to  $\beta$ 6 loop of IL-1 $\beta$ .

Note in particular the H-bonded contacts made by Lys 65, the salt-bridge interaction between Glu 64 and Arg H101 and the anion- $\pi$  interaction of Glu 64 with Tyr L50.

**Suppl. Figure 7: Conformational change affecting the  $\beta 5$  to  $\beta 6$  loop of IL-1 $\beta$**

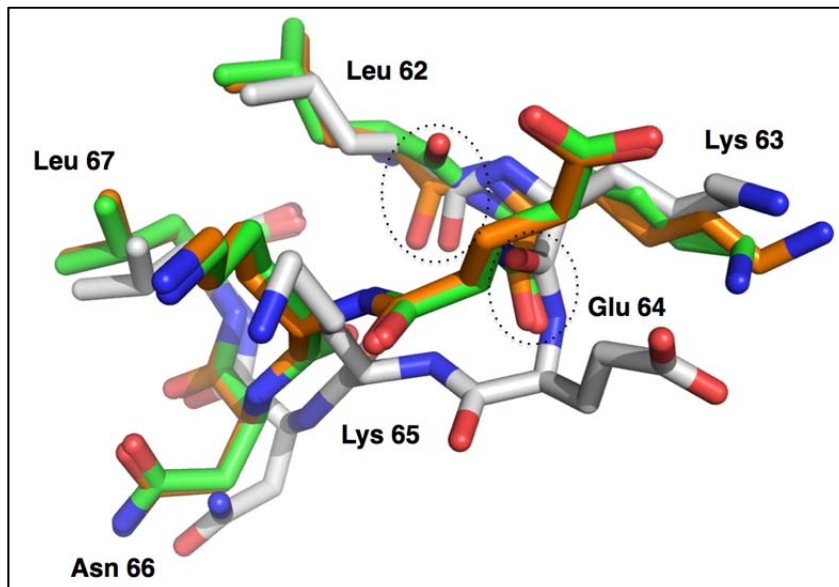

**Suppl. Figure 7:** Conformational change affecting the  $\beta 5$  to  $\beta 6$  loop of IL-1 $\beta$ . Structural overlay showing the  $\beta 5$  to  $\beta 6$  loop of IL-1 $\beta$  (amino-acid residues 62 to 67) in the free state (PDB entry 2I1B, grey stick) and in the canakinumab-bound state (orange stick, this work; green stick, PDB entry 4G6J). Note the large shift of Glu 64 and the flip of the Lys 63 – Glu 64 peptide bond (dashed circle). Note that the orientation of the Leu 62 – Lys 63 peptide bond of the antibody-bound state is similar to that of the free state in the work reported here.

1 **Suppl. Figure 8:** Amino acid comparison between human and non-human primate mature IL-1 $\beta$

```

Human IL-1 $\beta$           1                                     60
Marmoset IL-1 $\beta$       APVRSLNCTLRDSQQKSLVMSGPYELKALHLQGQDMEQQVVFMSFVQGEESNDKIPVAL
Cyno IL-1 $\beta$           APVRSLNCTLRDAQQKCLVMSGPYELKALHLQGQDLEQQVVFMSFVQGEESNDKIPVAL
                      *****.*.*.*****.*.*****
61                                     120
Human IL-1 $\beta$           GLKEKNLYLSCVLKDDKPTLQLESVDPKNYPKKKMEKRFVFNKIEINNKLFEFSAQFPNW
Marmoset IL-1 $\beta$       GLKEKNLYLSCVLKDDKPTLQLESVDPKNYPKKKMEKRFVFNKTEINNKLFEFSAQFPNW
Cyno IL-1 $\beta$           GLKAKNLYLSCVLKDDKPTLQLESVDPKNYPKKKMEKRFVFNKIEINNKLFEFSAQFPNW
                      ***.*****.*.*****.*.*****
121
Human IL-1 $\beta$           YISTSQAENMPVFLGGTKGGQDITDFTMQFVSS
Marmoset IL-1 $\beta$       YISTSQAENMPVFLGGTKGGQDITDFTMQFVS-
Cyno IL-1 $\beta$           YISTSQAENMPVFLGGTRGGQDITDFTMQFVS-
                      *****.*.*****

```

2

3

4 **Suppl. Figure 9: Mechanism of IL-1 $\beta$  neutralization by canakinumab**

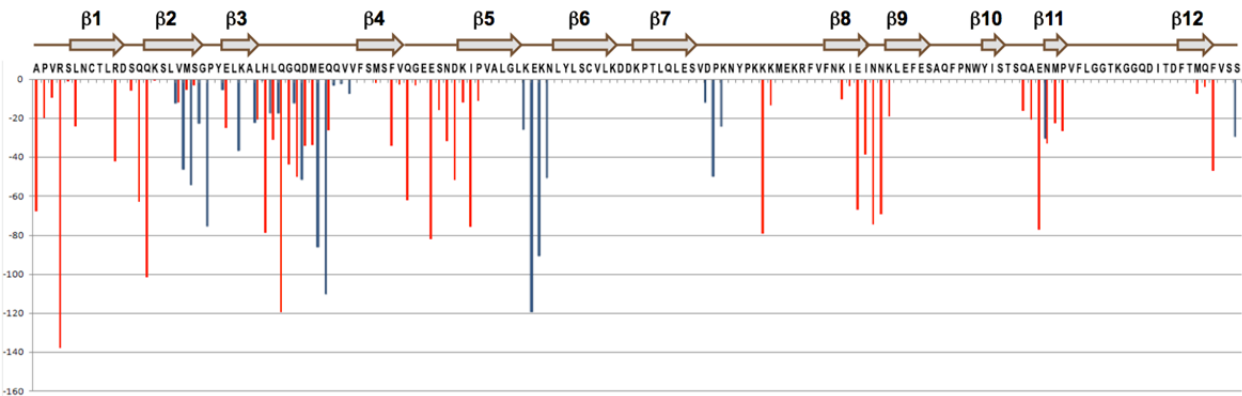

5

6 **Suppl. Figure 9:** Graph showing the reduction (Y axis, in Å<sup>2</sup>) in solvent-accessible surface of IL-1 $\beta$   
7 residues (X axis) upon binding to IL-1RI (red bars) or canakinumab (blue bars). The amino-acid sequence  
8 of IL-1 $\beta$  is shown together with the corresponding secondary structure elements. Note the overlap

- 1 between the two binding interfaces, notably in the region of the amino-acids Val 19 to Glu 25 and Leu 29
- 2 to Gln 38.
